# Supplementary material
Source: publisher site journal article supplement (https://e-cmh.org/upload/media/cmh-2024-0060-Supplementary-Table-1.pdf)
Supplement: Supplementary file 1 [file cmh-2024-0060-Supplementary-Table-1.pdf]

**Supplementary Table 1.** List of antibodies used in this study

| Antibodies                 | Source         | Catalog No.  |
|----------------------------|----------------|--------------|
| Mouse anti-CIITA           | Santa Cruz     | Sc-13556     |
| Mouse anti-HNF1 $\alpha$   | Santa Cruz     | sc-393925    |
| Mouse anti-HNF4 $\alpha$   | Santa Cruz     | sc-374229    |
| Mouse anti-HNF3 $\beta$    | Santa Cruz     | sc-101060    |
| Mouse anti-C/EBP $\alpha$  | Santa Cruz     | sc-365318    |
| Rabbit anti-ERK            | Cell signaling | #9102S       |
| Rabbit anti-p-ERK          | Cell signaling | #9101S       |
| Rabbit anti-p38            | Cell signaling | #9212S       |
| Rabbit anti-p-p38          | Cell signaling | #9211S       |
| Rabbit anti-JNK            | Cell signaling | #9252S       |
| Mouse anti-p-JNK           | Cell signaling | #9251S       |
| Mouse anti- $\beta$ -Actin | Sigma Aldrich  | A5316        |
| Mouse anti-HBx             | Bio vendor     | RD9810-38100 |
| Mouse anti-Myc-tag         | MBL            | M047-3       |
| Rabbit anti-HA-tag-        | Sigma Aldrich  | H6908        |
